# Supplementary material
Source: PubMed Central journal article supplement (PMC1950936)

**A**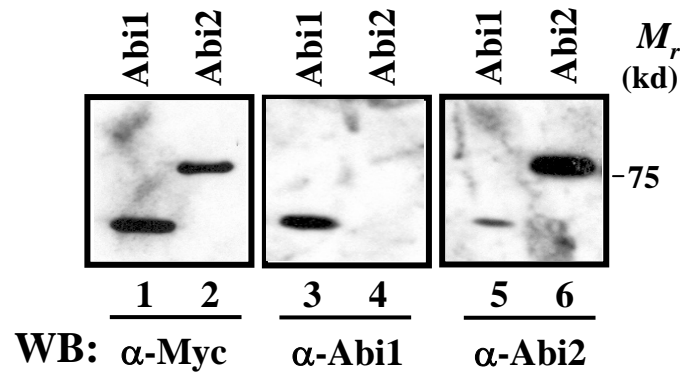**B**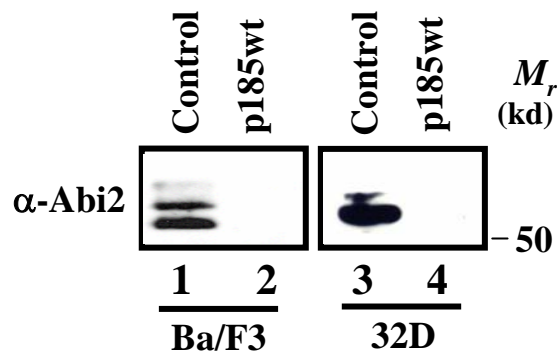

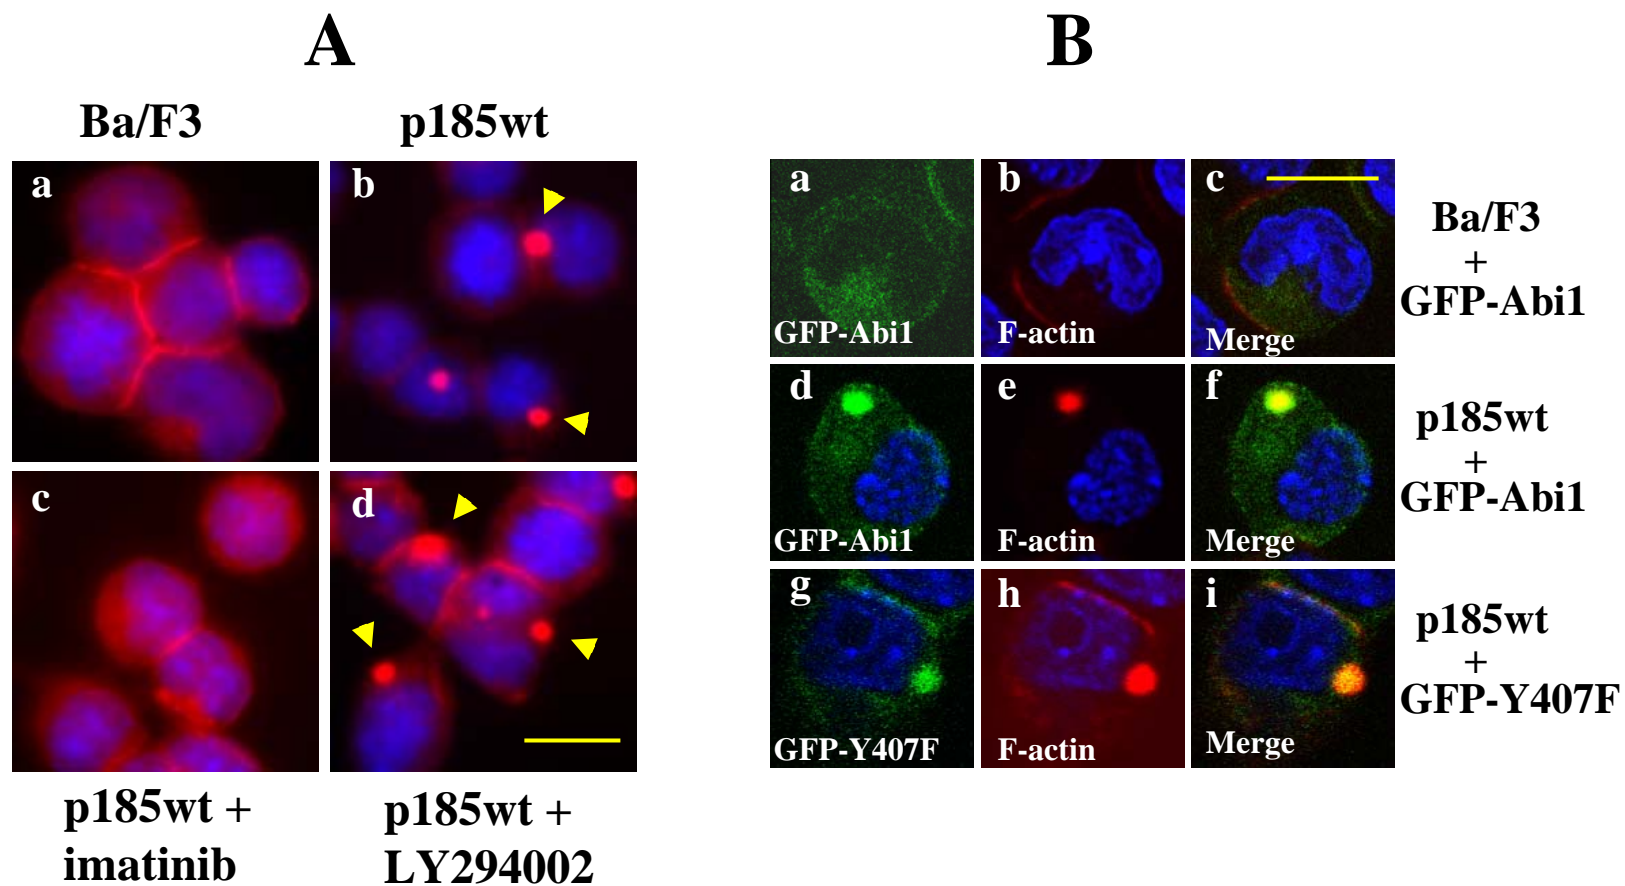



**A**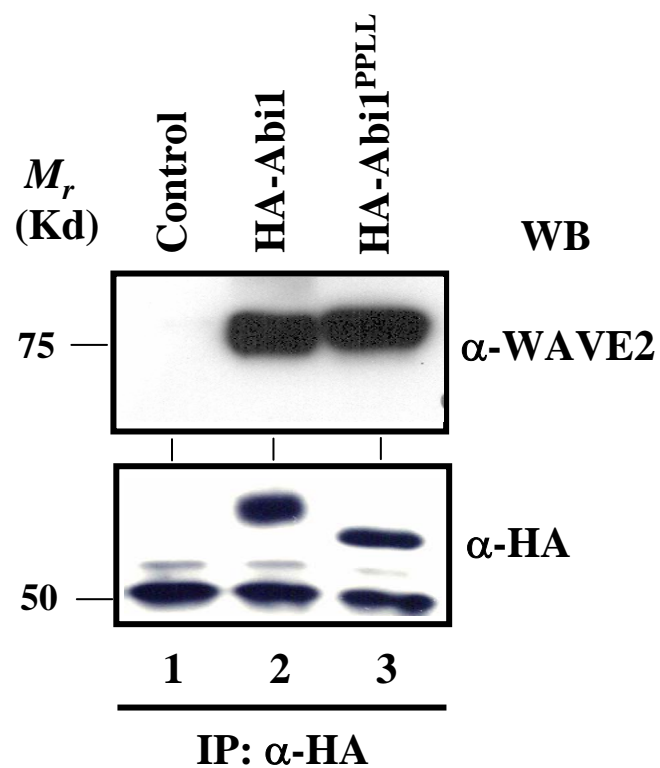**B**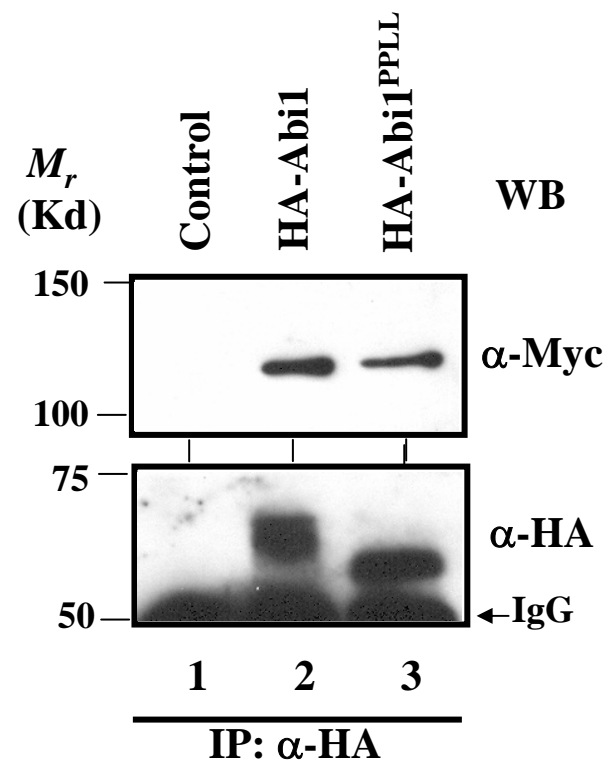

**A**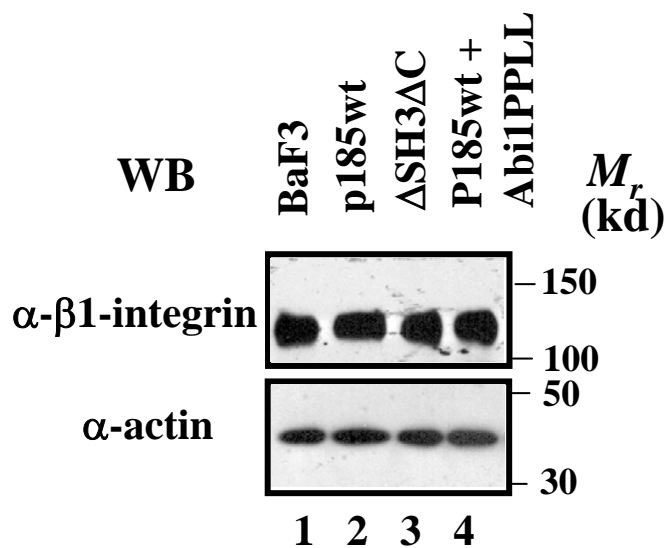**B**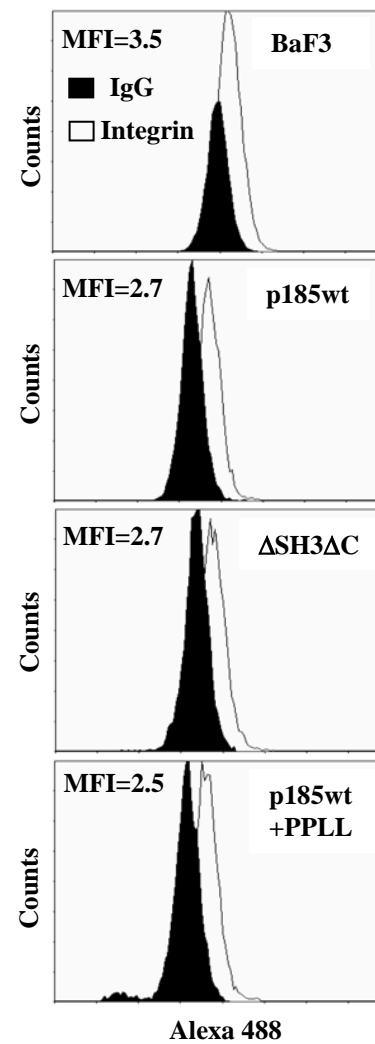

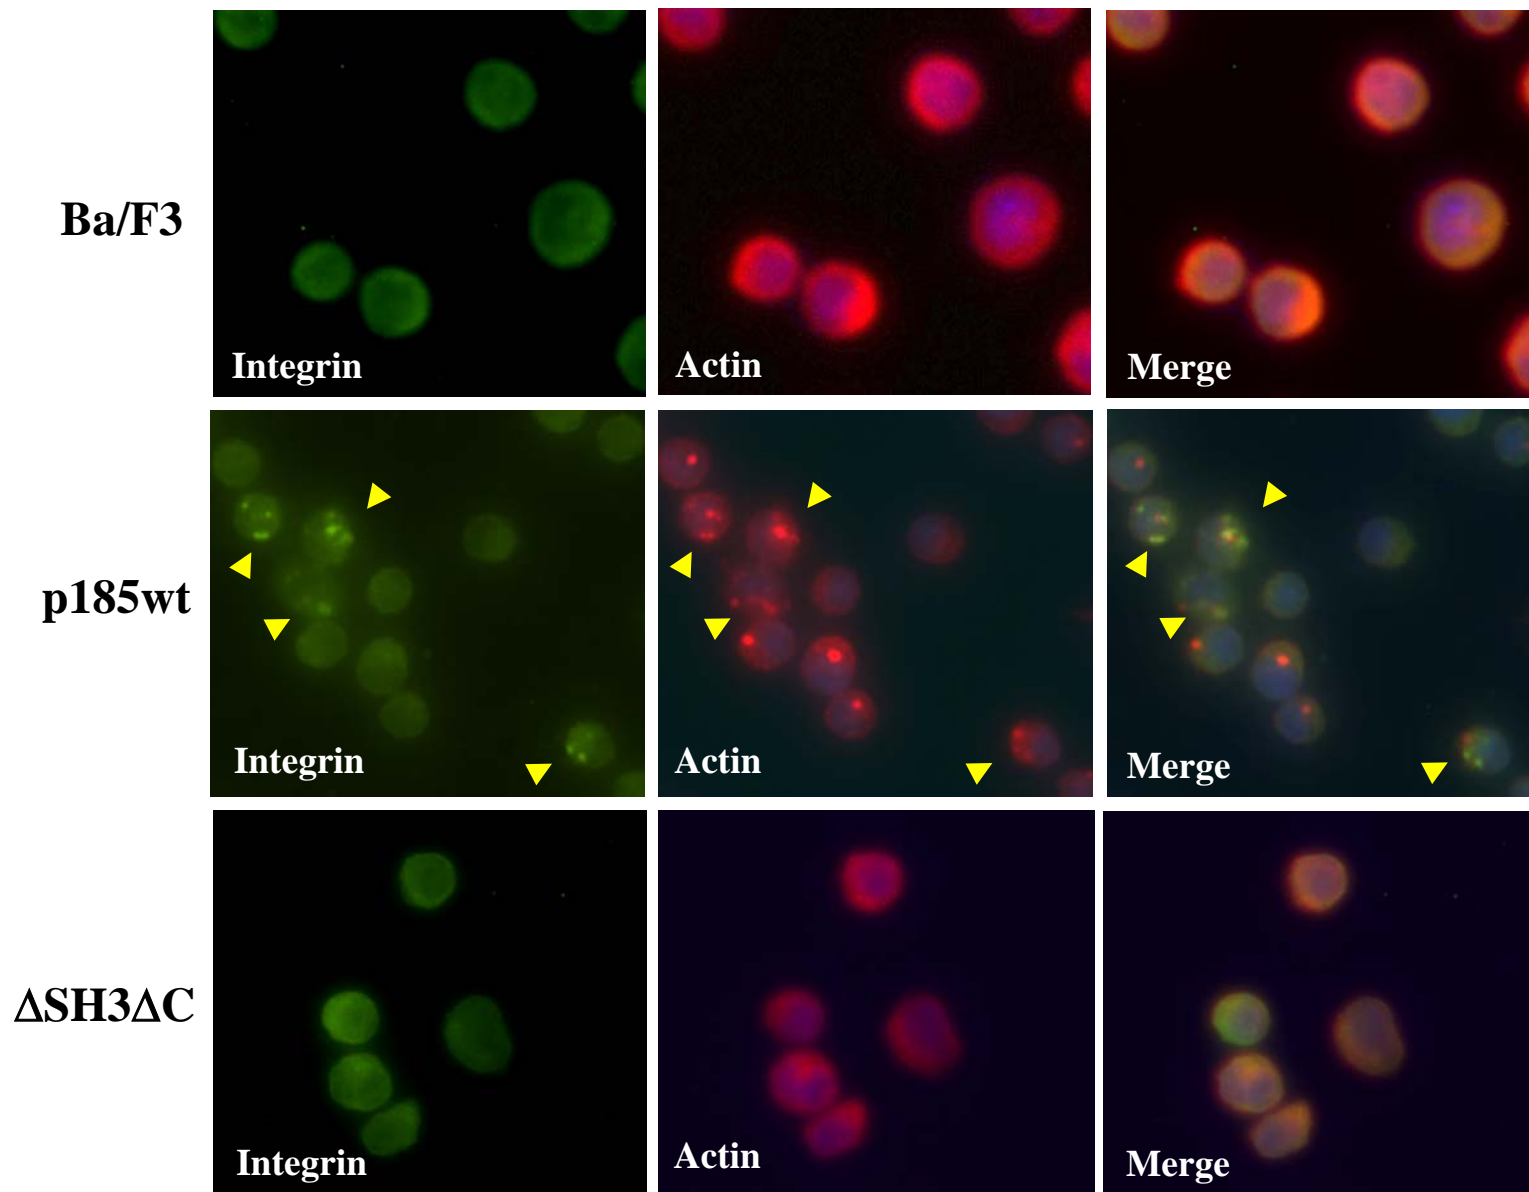

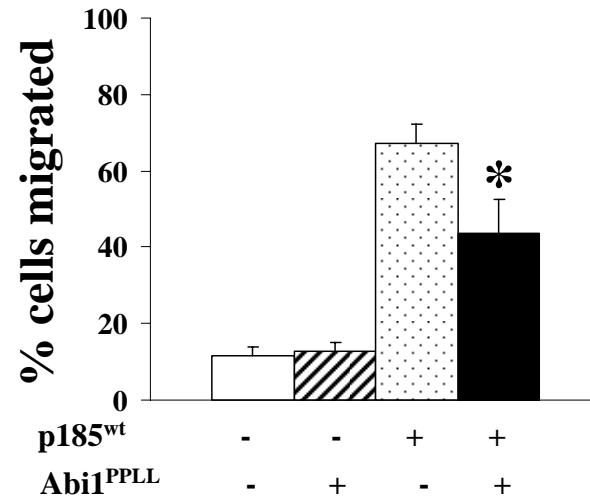

Supplement: NIHMS24689-supplement-supplement_1.pdf [file NIHMS24689-supplement-supplement_1.pdf]
